# Supplementary material
Source: PubMed Central journal article supplement (PMC6506677)
Supplement: 10-1055-s-0038-1637005-s1700054.pdf [file 10-1055-s-0038-1637005-s1700054.pdf]

**Supplemental Table S1** Survey questions and potential focus group questions from facilitator script

|                       |                                                                                                                                                                                                                                                                                                                                                                                                                                                                                                                                                                                                                                                                                                                                                                                                                                                                                                                                                                                                                                                                                           |
|-----------------------|-------------------------------------------------------------------------------------------------------------------------------------------------------------------------------------------------------------------------------------------------------------------------------------------------------------------------------------------------------------------------------------------------------------------------------------------------------------------------------------------------------------------------------------------------------------------------------------------------------------------------------------------------------------------------------------------------------------------------------------------------------------------------------------------------------------------------------------------------------------------------------------------------------------------------------------------------------------------------------------------------------------------------------------------------------------------------------------------|
| Survey questions      | <ul style="list-style-type: none"> <li>-Please list three ways your child or family was affected by this brain injury or illness</li> <li>-Please list three ways health care providers could assist children and families like yours in the future</li> <li>-Please list any additional resources you believe could assist children and families like yours</li> </ul>                                                                                                                                                                                                                                                                                                                                                                                                                                                                                                                                                                                                                                                                                                                   |
| Facilitator questions | <ul style="list-style-type: none"> <li>-Tell me about how your child’s life was affected by their brain injury or illness</li> <li>-Tell me about how you, as a parent, were affected by your child’s illness</li> <li>-Tell me about how other members of your family were affected by your child’s illness</li> <li>-When thinking back to the initial hospital stay, how could health care providers have better assisted your child or family in dealing with challenges you faced</li> <li>-When thinking back on the time since leaving the hospital, are there areas where a health care provider could have assisted your child or family with challenges you faced</li> <li>-Are there resources you found helpful in dealing with challenges you’ve identified after leaving the hospital</li> <li>-Are there resources you think would be helpful, but have been unable to access, when dealing with the challenges you’ve identified</li> <li>-What barriers have you faced when trying to access resources your child or family needed after leaving the hospital</li> </ul> |
